# Supplementary material for: Sepsis Induces Hematopoietic Stem Cell Exhaustion and Myelosuppression through Distinct Contributions of TRIF and MYD88
Source: PubMed Central journal article supplement — Stem Cell Reports. 2016 Jun 2;6(6):940–56. doi: 10.1016/j.stemcr.2016.05.002 (PMC4911503; doi:10.1016/j.stemcr.2016.05.002), 2016-06-02

**Stem Cell Reports, Volume 6**

**Supplemental Information**

**Sepsis Induces Hematopoietic Stem Cell Exhaustion and Myelosuppression through Distinct Contributions of TRIF and MYD88**

**Huajia Zhang, Sonia Rodriguez, Lin Wang, Soujuan Wang, Henrique Serezani, Reuben Kapur, Angelo A. Cardoso, and Nadia Carlesso**

**Figure S1**

**A**

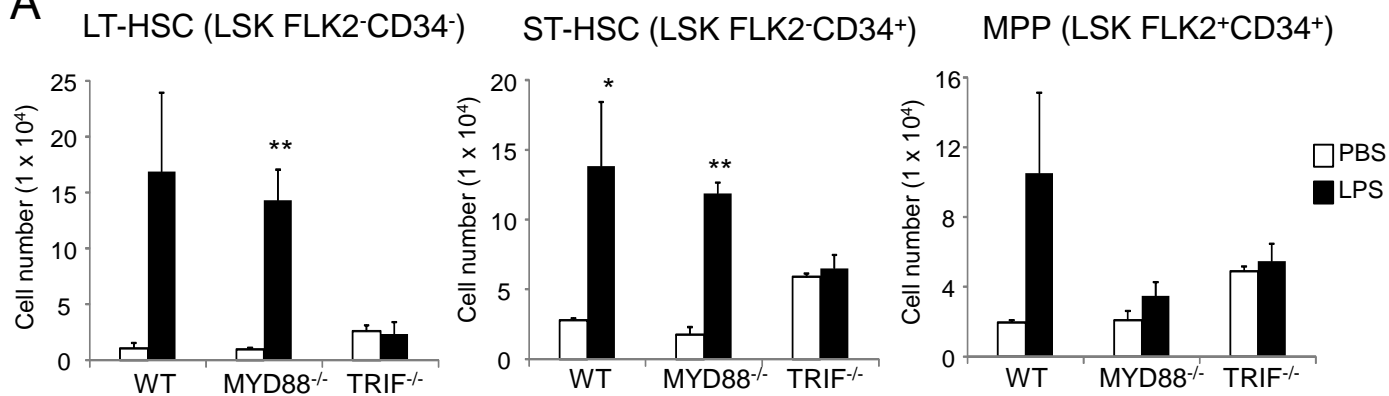

**B**

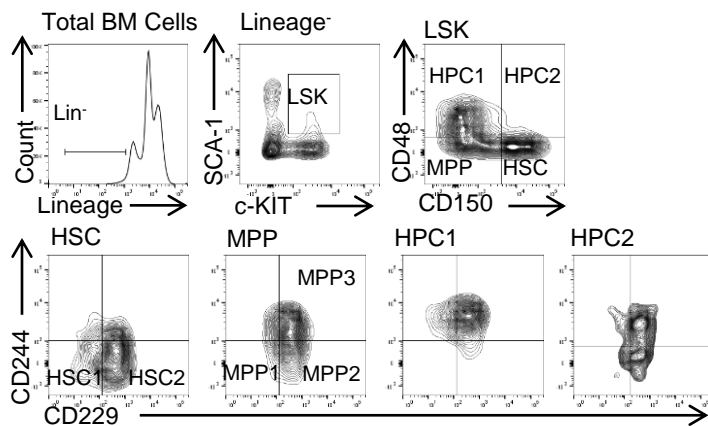

**C**

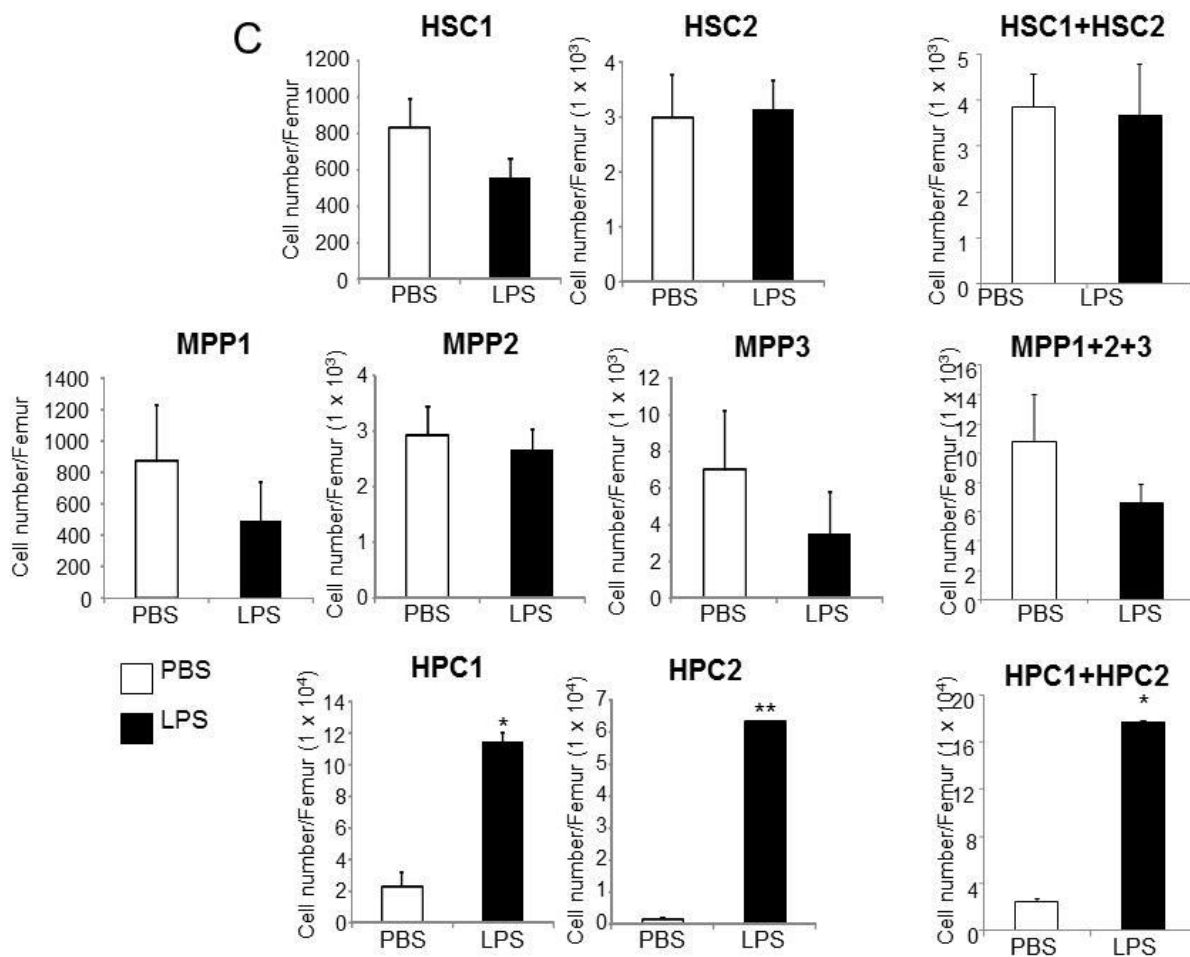

Figure S2

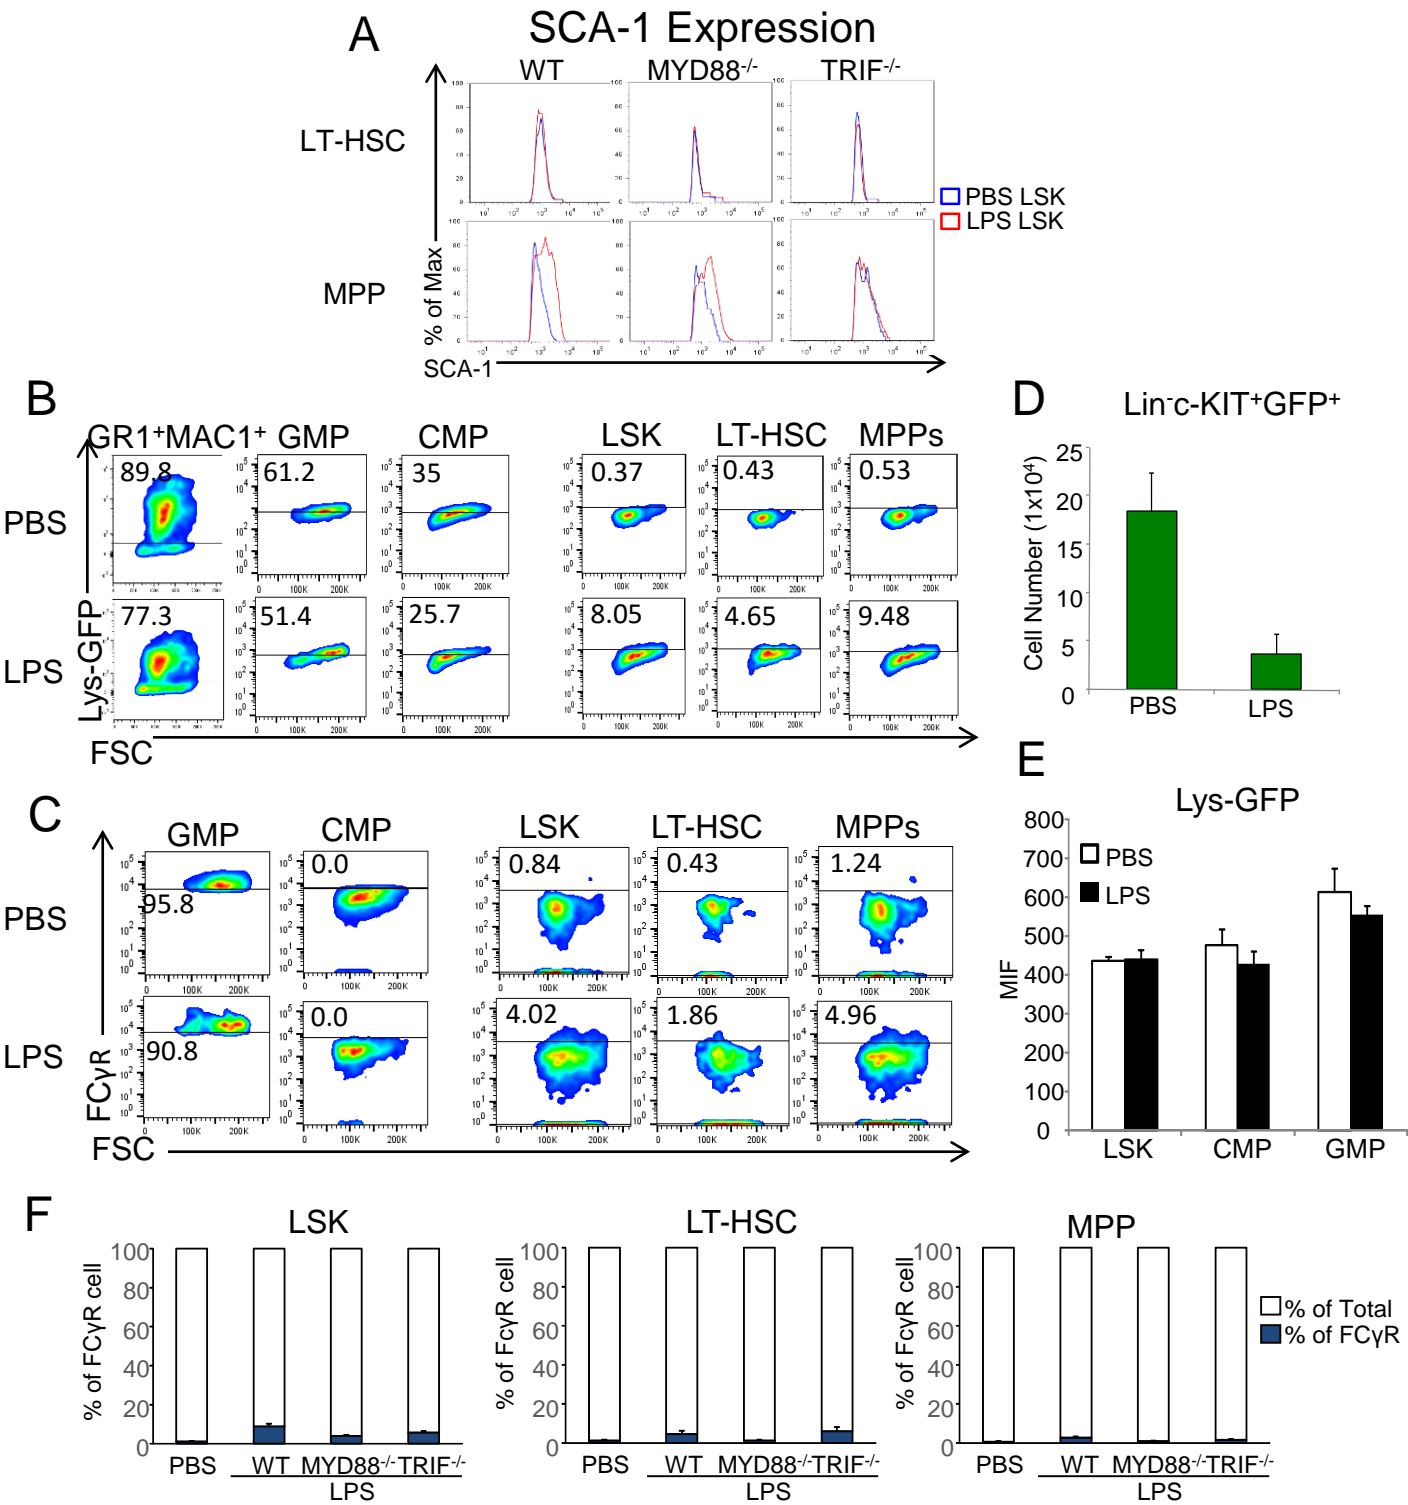

**Figure S3**

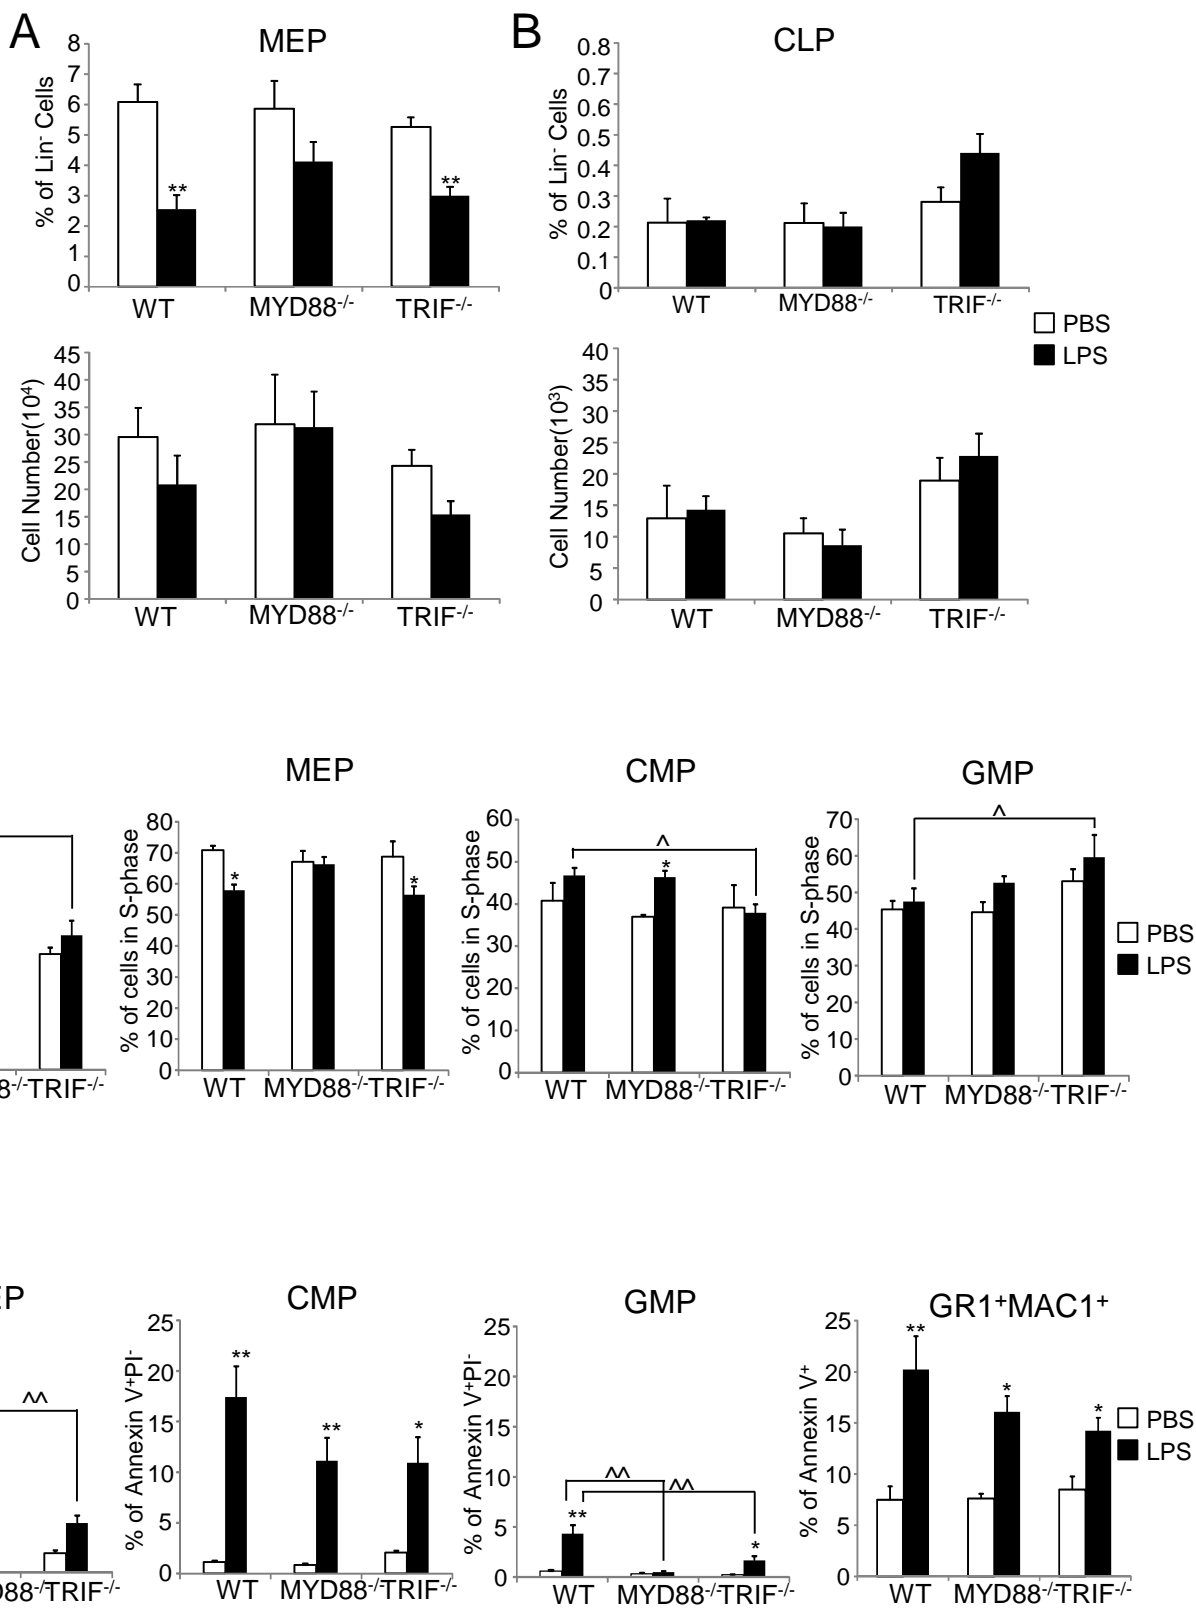

**Figure S4**

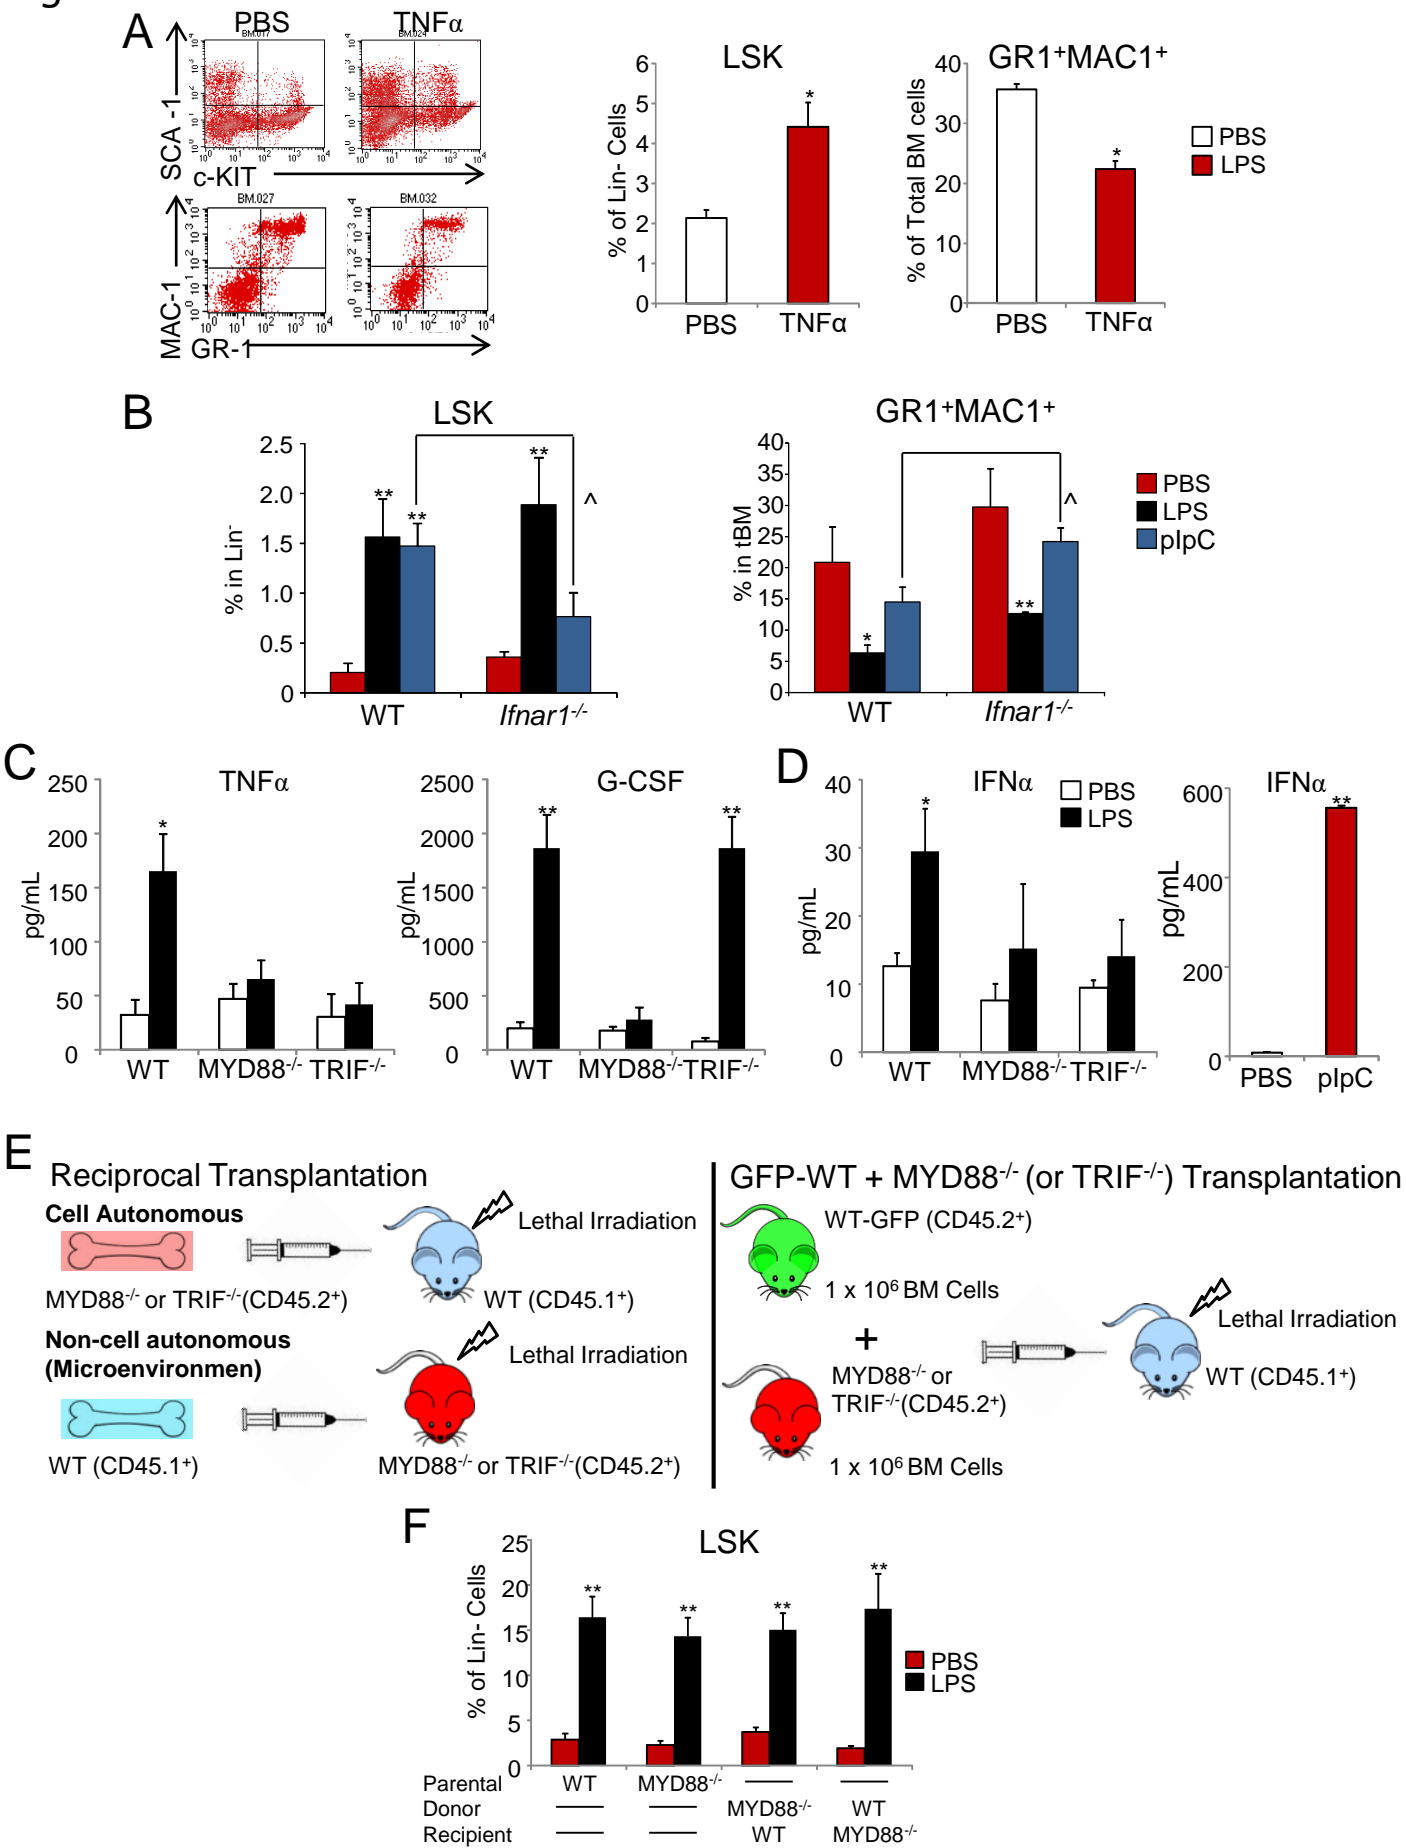

Figure S5

A

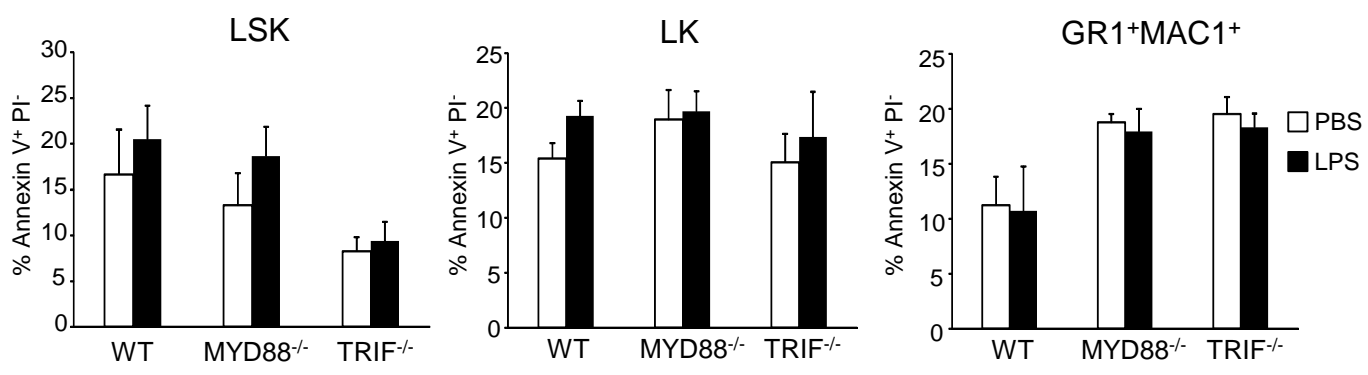

B

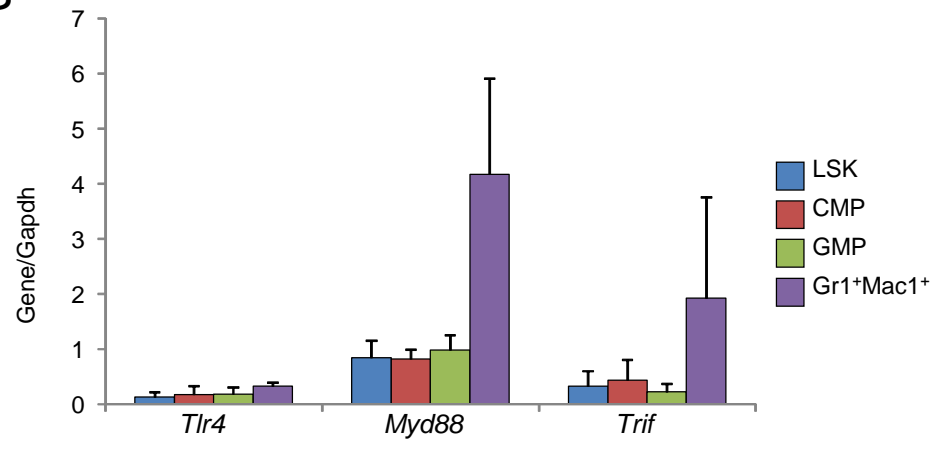

Figure S6

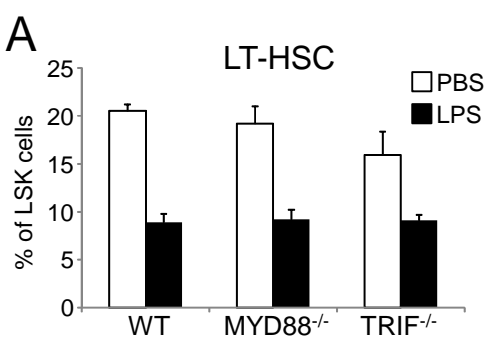

|                      | % of LT-HSC in LSK cells |       |      |       | Cell/2500 LSK |     | LT-HSC adjusted |         |
|----------------------|--------------------------|-------|------|-------|---------------|-----|-----------------|---------|
|                      | PBS                      | SEM   | LPS  | SEM   | PBS           | LPS | PBS             | LPS     |
| WT                   | 20.5                     | ±0.66 | 8.87 | ±0.91 | 512           | 211 | 512             | 200.872 |
| MYD88 <sup>-/-</sup> | 19.1                     | ±1.79 | 9.19 | ±0.97 | 478           | 229 | 467.484         | 225.794 |
| TRIF <sup>-/-</sup>  | 15.9                     | ±2.46 | 9.09 | ±0.57 | 397           | 227 | 392.236         | 211.564 |

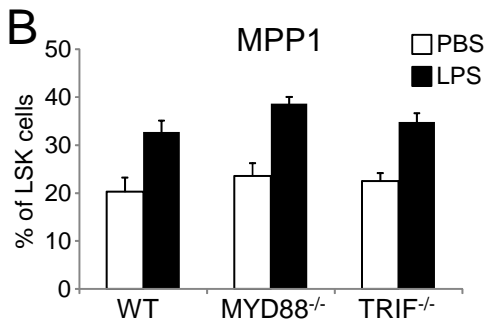

|                      | % of MPP1 in LSK cells |       |      |       | Cells/2500 cells |     | MPP1 adjusted |         |
|----------------------|------------------------|-------|------|-------|------------------|-----|---------------|---------|
|                      | PBS                    | SEM   | LPS  | SEM   | PBS              | LPS | PBS           | LPS     |
| WT                   | 20.2                   | ±2.97 | 32.7 | ±2.42 | 505              | 817 | 498.94        | 794.941 |
| MYD88 <sup>-/-</sup> | 23.6                   | ±2.62 | 38.6 | ±1.43 | 590              | 965 | 587.64        | 955.35  |
| TRIF <sup>-/-</sup>  | 22.6                   | ±1.86 | 34.7 | ±1.84 | 565              | 867 | 559.915       | 852.261 |

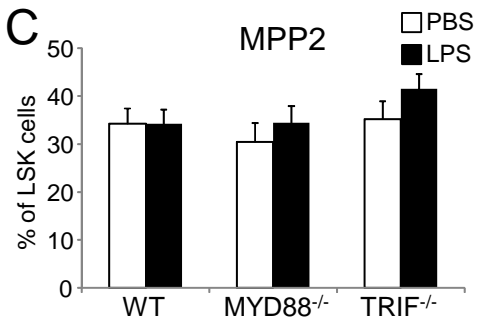

|                      | % of MPP2 in LSK cells |       |      |       | Cells/2500 cells |      | MPP2 adjusted |          |
|----------------------|------------------------|-------|------|-------|------------------|------|---------------|----------|
|                      | PBS                    | SEM   | LPS  | SEM   | PBS              | LPS  | PBS           | LPS      |
| WT                   | 34.2                   | ±3.17 | 34.2 | ±2.9  | 856              | 855  | 845.728       | 831.915  |
| MYD88 <sup>-/-</sup> | 30.4                   | ±3.98 | 34.4 | ±3.49 | 761              | 861  | 757.956       | 852.39   |
| TRIF <sup>-/-</sup>  | 33                     | ±3.33 | 41.5 | ±3.10 | 826              | 1038 | 818.566       | 1020.354 |

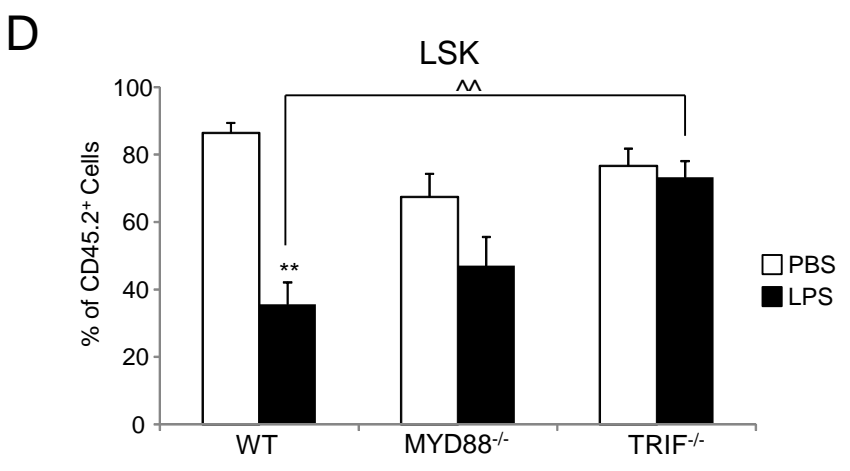

Figure S7

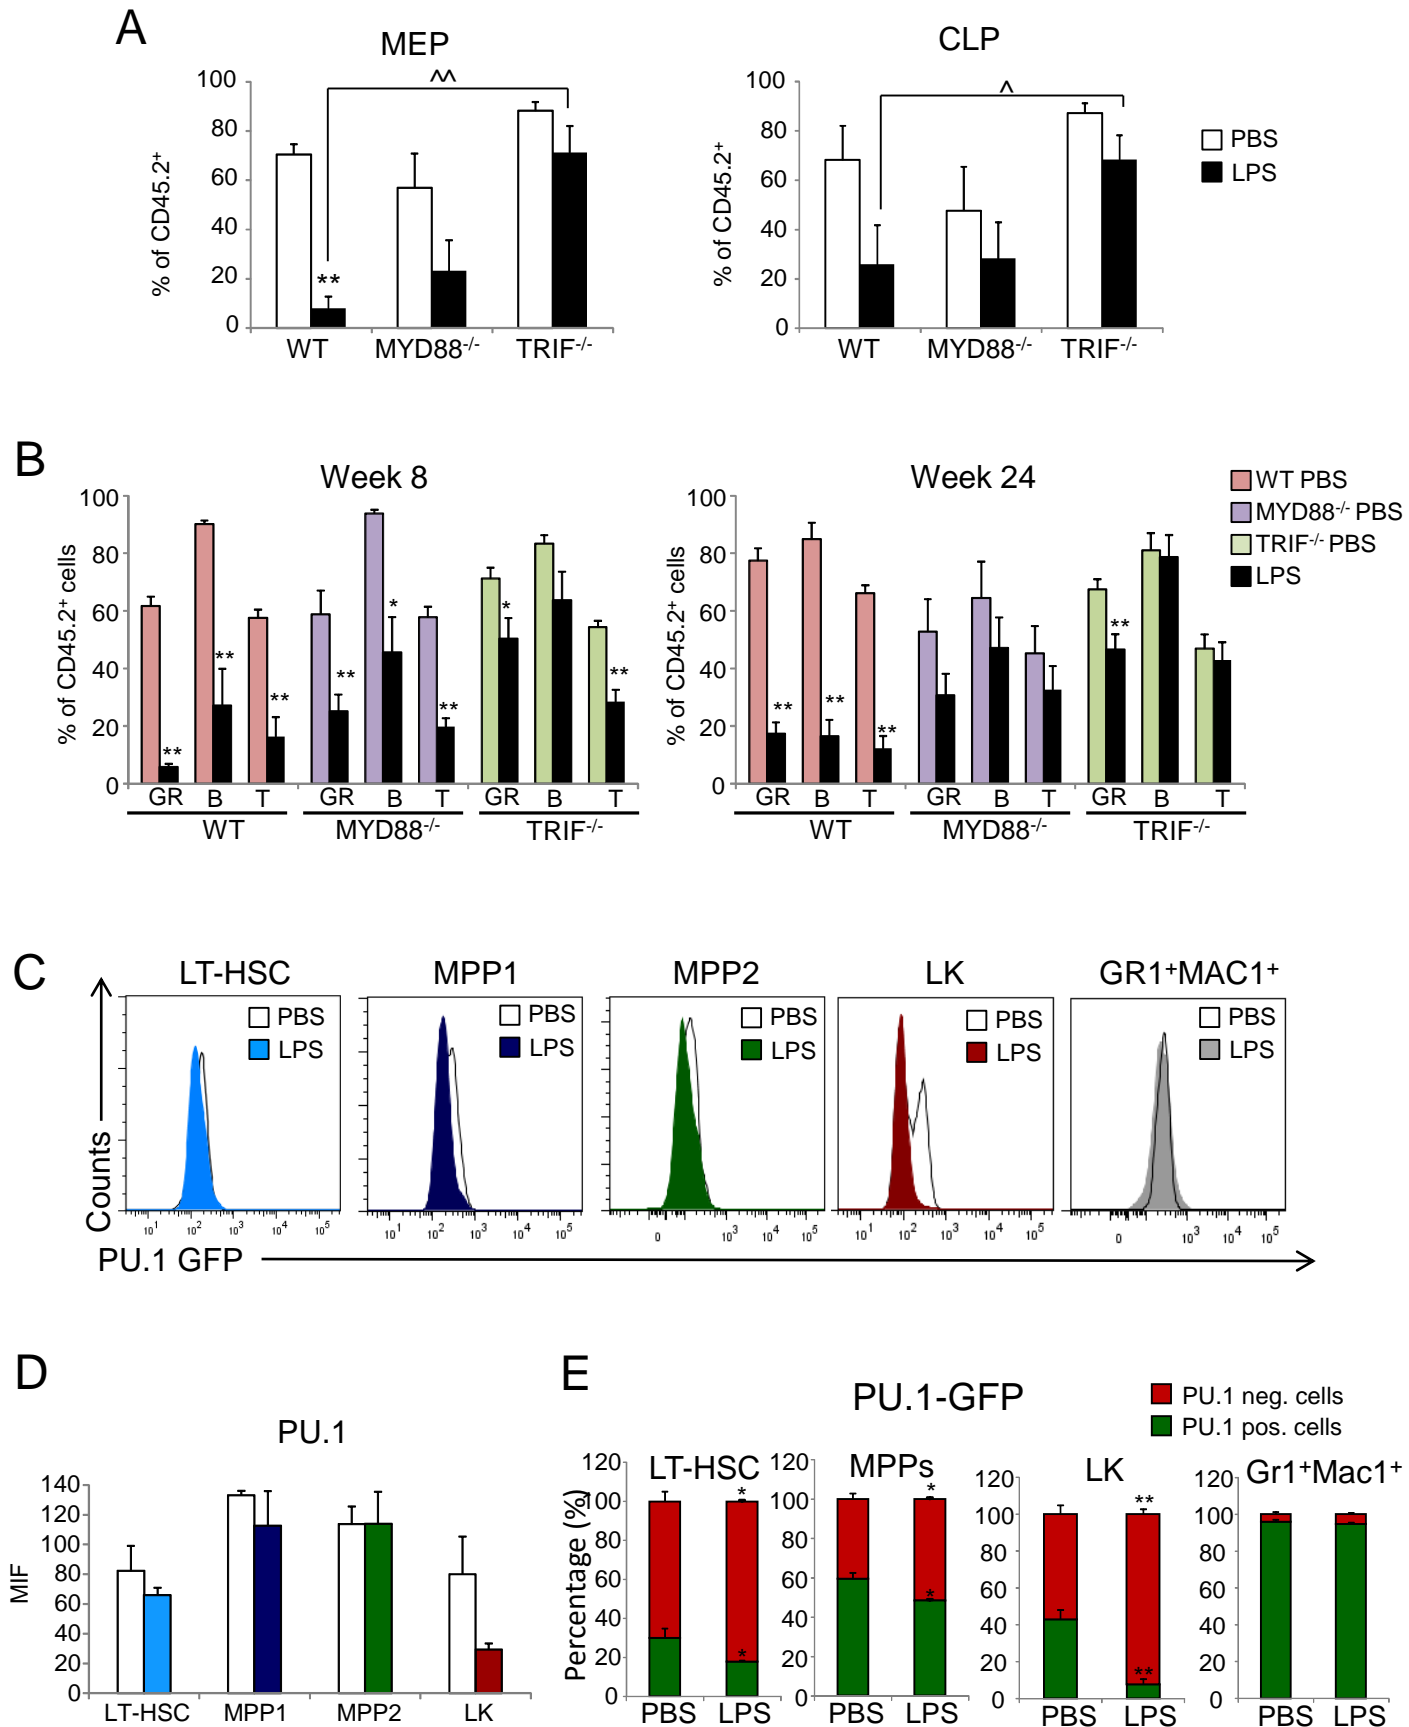

Supplement: mmc1.pdf [file mmc1.pdf]
